# Supplementary material for: Thumb and finger movement is reduced after stroke: An observational study
Source: PubMed Central journal article supplement (PMC6561636; doi:10.1371/journal.pone.0217969), 2019-06-12
Supplement: pone.0217969.s001.pdf [file pone.0217969.s001.pdf]

**Supplementary Table 1. Effect of testing the non-dominant hand compared to the dominant hand in subjects with stroke.** Data are shown as mean (SD) unless otherwise stated.

|                                      | Thumb             |                       |                             |         | Finger            |                       |                             |         |
|--------------------------------------|-------------------|-----------------------|-----------------------------|---------|-------------------|-----------------------|-----------------------------|---------|
|                                      | Dominant<br>(n=6) | Non-dominant<br>(n=7) | Mean difference<br>(95% CI) | p value | Dominant<br>(n=7) | Non-dominant<br>(n=8) | Mean difference<br>(95% CI) | p value |
| Amplitude of movement<br>(% flexion) | 6 (2)             | 11 (4)                | 5<br>(1 to 9)*              | 0.02    | 6 (2)             | 7 (2)                 | 1<br>(-1 to 3)              | 0.30    |
| Cadence<br>(movements/sec)           | 0.3 (0.3)         | 0.4 (0.2)             | 0.2<br>(-0.2 to 0.5)        | 0.30    | 0.4 (0.2)         | 0.4 (0.3)             | 0<br>(-0.2 to 0.3)          | 0.80    |
| Velocity<br>(% flexion/sec)          | 16 (4)            | 28 (13)               | 12<br>(1 to 24)*            | 0.04    | 15 (3)            | 17 (4)                | 2<br>(-2 to 6)              | 0.36    |
| Percentage of idle time<br>(%)       | 90 (7)            | 84 (7)                | -7<br>(-16 to 2)            | 0.14    | 85 (7)            | 83 (9)                | -2<br>(-11 to 6)            | 0.58    |
| Longest idle time<br>(sec)           | 950 (897)         | 256 (342)             | -695<br>(-1497 to 108)      | 0.08    | 770 (846)         | 305 (329)             | -465<br>(-1162 to 232)      | 0.17    |

Data are shown as mean (SD) unless otherwise stated.

\* 95% CI lie to one side of 0
