# Supplementary material for: Thumb and finger movement is reduced after stroke: An observational study
Source: PubMed Central journal article supplement (PMC6561636; doi:10.1371/journal.pone.0217969), 2019-06-12
Supplement: pone.0217969.s002.pdf [file pone.0217969.s002.pdf]

**Supplementary Table 2. Effect of hand motor function on outcomes in subjects with stroke.** Hand motor function is measured using the Motor Assessment Scale (MAS). Data are shown as mean (SD) unless otherwise stated.

|                                      | Thumb<br>(n=13)                  |         |                                  |         | Finger<br>(n=15)                 |         |                                  |         |
|--------------------------------------|----------------------------------|---------|----------------------------------|---------|----------------------------------|---------|----------------------------------|---------|
|                                      | MAS 7<br>mean effect<br>(95% CI) | P value | MAS 8<br>mean effect<br>(95% CI) | P value | MAS 7<br>mean effect<br>(95% CI) | P value | MAS 8<br>mean effect<br>(95% CI) | P value |
| Amplitude of movement<br>(% flexion) | 0.1<br>(-0.8 to 1.0)             | 0.86    | 0.2<br>(-0.8 to 1.2)             | 0.66    | 0.5<br>(0.3 to 0.8)*             | 0.001   | 0.5<br>(0.2 to 0.8)*             | 0.005   |
| Cadence<br>(movements/sec)           | 0.08<br>(0.05 to 0.11)*          | <0.001  | 0.09<br>(0.06 to 0.11)*          | <0.001  | 0.06<br>(0.02 to 0.10)*          | 0.004   | 0.07<br>(0.03 to 0.11)*          | 0.002   |
| Velocity<br>(% flexion/sec)          | 0.2<br>(-2.4 to 2.7)             | 0.88    | 1.0<br>(-2.1 to 3.4)             | 0.60    | 0.9<br>(0.4 to 1.5)*             | 0.003   | 1.0<br>(0.5 to 1.6)*             | 0.002   |
| Percentage of idle time<br>(%)       | -2.0<br>(-3.2 to -0.9)*          | 0.003   | -2.1<br>(-3.5 to -0.8)*          | 0.005   | -1.6<br>(-2.9 to -0.3)*          | 0.021   | -1.8<br>(-3.2 to -0.3)*          | 0.019   |
| Longest idle time<br>(sec)           | -165<br>(-288 to -42)*           | 0.013   | -146<br>(-296 to 4)              | 0.055   | -123<br>(-240 to -6)*            | 0.04    | -115<br>(-249 to 19)             | 0.086   |

\* 95% CI lie to one side of 0
